# Supplementary material for: Online Pestkoppenstoppen: systematic and theory-based development of a web-based tailored intervention for adolescent cyberbully victims to combat and prevent cyberbullying
Source: PubMed Central journal article supplement (PMC4040503; doi:10.1186/1471-2458-14-396), 2014-04-24
Supplement: 1471-2458-14-396-S1.pdf [file 1471-2458-14-396-S1.pdf]

**Table 1***POs, determinants, COs, theoretical methods and practical applications of Online Pestkoppentoppen*

| <b>Performance objectives</b>                                   | <b>Determinant</b>                     | <b>Change objective</b>                                                   | <b>Theoretical Method</b>            | <b>Practical application</b>                                                                                                                                             |
|-----------------------------------------------------------------|----------------------------------------|---------------------------------------------------------------------------|--------------------------------------|--------------------------------------------------------------------------------------------------------------------------------------------------------------------------|
| 1. Monitor and evaluate thoughts after (cyber)bully experience. | Knowledge                              | Describe irrational thoughts' differing characteristics.                  | 1. Providing cues<br>2. Tailoring    | Participant receives tailored and non-tailored cues from DG that help recognising irrational thoughts.                                                                   |
|                                                                 | Self-efficacy & Behavioural capability | Demonstrate how to recognise thoughts.                                    | 1. Providing cues<br>2. Tailoring    | VMs demonstrate how to use cues in recognising irrational thoughts and gives participant examples of recognising thoughts, amount of examples tailored to self-efficacy. |
|                                                                 | Outcome expectations                   | Expect to be able to recognise and dispute irrational unhelpful thoughts. | 1. Repeated exposure<br>2. Modelling | DG explains and VM demonstrates how to recognise irrational thoughts. Identification tips are provided. Participant is reminded several times                            |

---

|                                                                                         |                                        |                                                                                             |                                                                                                                     |                                                                                                                                                                                                                                |
|-----------------------------------------------------------------------------------------|----------------------------------------|---------------------------------------------------------------------------------------------|---------------------------------------------------------------------------------------------------------------------|--------------------------------------------------------------------------------------------------------------------------------------------------------------------------------------------------------------------------------|
|                                                                                         | Awareness                              | Be aware of irrational thoughts after (cyber)bully experience.                              | <ol style="list-style-type: none"> <li>1. Consciousness raising</li> <li>2. Tailoring</li> </ol>                    | <p>to be aware of irrational thoughts.</p> <p>DG reflects on tailored irrational thoughts of participant. DG and video model explain the 55G-schema.</p>                                                                       |
| 2. Gain insight into relationship irrational thoughts, negative emotions and behaviour. | Knowledge                              | Explain relation between (cyber)bully event, thoughts, feelings, behaviour and consequence. | <ol style="list-style-type: none"> <li>1. Chunking</li> <li>2. Advanced organisers</li> <li>3. Tailoring</li> </ol> | Participant receives explanation (and tailored examples) of (negative) 5G-schemas depicting each G.                                                                                                                            |
|                                                                                         | Self-efficacy & Behavioural capability | Demonstrate how to label thoughts (irrational/rational).                                    | <ol style="list-style-type: none"> <li>1. Guided practice</li> <li>2. Tailoring</li> <li>3. Modelling</li> </ol>    | <p>DG and video model explain and demonstrate how to label thoughts and give participant the opportunity to practice the labelling of thoughts.</p> <p>Feedback is provided. Amount of practice and example is tailored to</p> |

|                                                                          |           |                                                                                                                 |                                                                                                                          |                                                                                                                                                                               |
|--------------------------------------------------------------------------|-----------|-----------------------------------------------------------------------------------------------------------------|--------------------------------------------------------------------------------------------------------------------------|-------------------------------------------------------------------------------------------------------------------------------------------------------------------------------|
|                                                                          | Awareness | Be aware of relationship irrational thoughts and negative behaviour.                                            | <ol style="list-style-type: none"> <li>1. Consciousness raising</li> <li>2. Tailoring</li> </ol>                         | <p>self-efficacy.</p> <p>Participant receives tailored examples of negative 5G-schemas that are transformed into positive 5G-schemas by changing the irrational thoughts.</p> |
| 3. Replace irrational unhelpful thoughts with rational helpful thoughts. | Knowledge | Define rational thoughts and explain how rational thoughts induce a positive 5G-schema.                         | <ol style="list-style-type: none"> <li>1. Persuasive communication</li> <li>2. Chunking</li> <li>3. Tailoring</li> </ol> | <p>Participant receives examples of rational thoughts, explanations of why these thoughts will help, and positive 5G-schemas tailored to self-efficacy and coping style.</p>  |
|                                                                          | Attitude  | Feel positive about monitoring, evaluating, disputing and replacing irrational thoughts with rational thoughts. | <ol style="list-style-type: none"> <li>1. Arguments</li> </ol>                                                           | <p>VMs explain positive effects after monitoring, evaluating, disputing and replacing irrational thoughts with rational thoughts.</p>                                         |

|                                        |                                                                                      |                                                                                                                                                      |                                                                                                                                                                                                                                                                                                                               |
|----------------------------------------|--------------------------------------------------------------------------------------|------------------------------------------------------------------------------------------------------------------------------------------------------|-------------------------------------------------------------------------------------------------------------------------------------------------------------------------------------------------------------------------------------------------------------------------------------------------------------------------------|
| Self-efficacy & Behavioural capability | Demonstrate how to dispute and replace irrational thoughts with rational thoughts.   | <ol style="list-style-type: none"> <li>1. Modelling</li> <li>2. Guided practice</li> <li>3. Direct experiences</li> <li>4. Tailoring</li> </ol>      | <p>VMs (amount of videos is tailored to self-efficacy) demonstrate disputing and replacing irrational thoughts.</p> <p>Participant and DG practices the replacement of thoughts and receives feedback.</p>                                                                                                                    |
| Outcome expectations                   | Expect to be able to dispute and replace irrational thoughts with rational thoughts. | <ol style="list-style-type: none"> <li>1. Modelling</li> <li>2. Guided practice</li> <li>3. Repeated exposure</li> <li>4. Active learning</li> </ol> | <p>DG explains and VM demonstrates how to replace irrational thoughts with rational thoughts. An overview of replaced thoughts is provided.</p> <p>Rational thoughts should be installed as screensaver prompts, stickers or as a list above the participant's bed.</p> <p>Replacing thoughts is practiced with feedback.</p> |

|                                     |                 |                                          |                                                      |                                                                                                                                                                                                                                     |
|-------------------------------------|-----------------|------------------------------------------|------------------------------------------------------|-------------------------------------------------------------------------------------------------------------------------------------------------------------------------------------------------------------------------------------|
|                                     | Self-regulation | Plan to replace thoughts in daily life.  | 1. Goal-setting                                      | Participant chooses (a) goal(s) related to skills learned in the first advice.                                                                                                                                                      |
| 4. Recognise and regulate emotions. | Knowledge       | Define emotion regulation strategies.    | 1. Tailoring<br>2. Persuasive communication          | DG explains importance of emotion recognition and regulation. Participant receives emotion regulation techniques tailored to participant's score on the YSR's aggression and/or social problem scale and is encouraged to use them. |
|                                     | Attitude        | Feel positive about regulating emotions. | 1. Arguments<br>2. Direct experience<br>3. Tailoring | DG explains to participant with high scores on YSR aggression/social problems why emotion regulation is helpful in (cyber)bullying situations. Participant is encouraged to try the emotion regulation exercises and is             |

|                                        |                                                                      |                                      |                                                                                                                                                                                                                                                                                                                         |
|----------------------------------------|----------------------------------------------------------------------|--------------------------------------|-------------------------------------------------------------------------------------------------------------------------------------------------------------------------------------------------------------------------------------------------------------------------------------------------------------------------|
| Self-efficacy & Behavioural capability | Demonstrate how to recognise and regulate emotions and impulsivity.  | 1. Guided practice<br>2. Tailoring   | asked if (s)he feels the relaxation.<br><br>Participant with high scores on YSR aggression/social problems watches VM using emotion regulation techniques and receives practice, guidance and feedback in using these techniques. All participants receive models explaining and demonstrating recognition of emotions. |
| Outcome expectations                   | Expect that regulating/recognising emotions lead to better outcomes. | 1. Direct experience<br>2. Arguments | Participant should experience relaxation and calmness after regulating emotions. VMs provide arguments for the usefulness of recognising emotions.                                                                                                                                                                      |
| Self-regulation                        | Form plans to regulate                                               | 1. Active learning                   | Participant combines sentences into                                                                                                                                                                                                                                                                                     |

|                                                                                           |           |                                                                                  |                                                                                         |                                                                                                                                         |
|-------------------------------------------------------------------------------------------|-----------|----------------------------------------------------------------------------------|-----------------------------------------------------------------------------------------|-----------------------------------------------------------------------------------------------------------------------------------------|
|                                                                                           |           | emotions in daily life.                                                          | 2. Implementation intentions                                                            | plans for emotion regulation techniques in daily life.                                                                                  |
| 5. Gain insight into ineffective (aggressive/passive) coping style and negative outcomes. | Knowledge | Define ineffective (aggressive/passive) coping strategies and negative outcomes. | 1. Tailoring<br>2. Persuasive communication<br>3. Consciousness raising<br>4. Modelling | Participant receives tailored examples of ineffective coping strategies and negative outcomes (in comics, written/spoken text and VMs). |
|                                                                                           | Awareness | Be aware of current ineffective coping style.                                    | 1. Consciousness raising<br>2. Tailoring                                                | DG reflects on participant's current coping strategies and negative outcomes.                                                           |
| 6. Gain insight into APS coping and positive outcomes.                                    | Knowledge | Define APS coping strategies and positive outcomes.                              | 1. Persuasive communication<br>2. Advanced organisers                                   | Participant receives examples and overview of tailored and non-tailored APS coping strategies and positive outcomes.                    |
|                                                                                           | Attitude  | Feel positive about APS                                                          | 1. Arguments                                                                            | Positive effects of APS coping are                                                                                                      |

|                      |                                                      |                                       |                                                                                                                                                         |
|----------------------|------------------------------------------------------|---------------------------------------|---------------------------------------------------------------------------------------------------------------------------------------------------------|
|                      | coping.                                              | 2. Tailoring                          | explained. Tailored on YSR scores, participant receives instructions and positive effects of different social skills, and is encouraged to practice.    |
| Outcome expectations | Expect positive outcomes associated with APS coping. | 1. Direct experience<br>2. Modelling  | VM provides and DG explains positive experiences with APS coping. Participant is encouraged to practice the APS skill and think about positive effects. |
| Social Influence     | Explain social influence in APS coping.              | 1. Information about others' approval | DG describes influence of participant's APS behaviour on other adolescents, what they might think, and the dynamics of a bullying situation.            |
| Awareness            | Be aware of positive effects                         | 1. Consciousness raising              | DG describes APS coping and                                                                                                                             |

|                                                       |                                        |                                                                                      |                                                                                             |                                                                                                                                                                                  |
|-------------------------------------------------------|----------------------------------------|--------------------------------------------------------------------------------------|---------------------------------------------------------------------------------------------|----------------------------------------------------------------------------------------------------------------------------------------------------------------------------------|
|                                                       |                                        | of APS coping.                                                                       | 2. Framing                                                                                  | positive effects.                                                                                                                                                                |
| 7. Replace aggressive/passive coping with APS coping. | Social skills                          | Demonstrate social skills needed for APS coping.                                     | 1. Set tasks on gradient of difficulty<br>2. Tailoring<br>3. Goal setting                   | Participant receives additional extra social skills lessons tailored on YSR scores. Social skill lessons are linked with plans to use the skills in daily life.                  |
|                                                       | Self-esteem and self-confidence        | Demonstrate and explain importance of self-esteem and self-confidence in APS coping. | 1. Persuasive communication<br>2. Modelling                                                 | DG explains and importance of, and VMs demonstrate self-esteem/confidence in APS coping.                                                                                         |
|                                                       | Self-efficacy & Behavioural capability | Demonstrate how to use APS coping, apply social cognition and conflict resolution.   | 1. Set tasks on a gradient of difficulty<br>2. Tailoring<br>3. Enactive mastery experiences | Participant receives APS coping models, explanation and practice in different social skills. Conflict resolution is broken up in sub-skills. Feedback and additional lessons are |

|                                                                                              |                  |                                                 |                                                                                                               |                                                                                                                                                           |
|----------------------------------------------------------------------------------------------|------------------|-------------------------------------------------|---------------------------------------------------------------------------------------------------------------|-----------------------------------------------------------------------------------------------------------------------------------------------------------|
|                                                                                              |                  |                                                 | 4. Set tasks on a gradient of difficulty                                                                      | provided tailored to the progress measured.                                                                                                               |
|                                                                                              | Social influence | Recognise importance of seeking social support. | 1. Shifting focus                                                                                             | DG lists helpful help-behaviours of peers/parents/teacher when experiencing cyberbullying.                                                                |
|                                                                                              | Self-regulation  | Plan to use APS coping strategies.              | 1. Guided practice<br>2. Modelling<br>3. Persuasion<br>4. Planning coping responses/Implementation intentions | VM demonstrates and DG explains how to form plans, positive effects are provided and participant practices forming own action/coping plans with feedback. |
| 8. Gain insight into assertive behaviour (and nvc patterns*) and its outcomes in relation to | Knowledge        | Lists effective nvc patterns.                   | 1. Using Imagery<br>2. Modelling                                                                              | Participant receives examples of nvc in assertiveness and starting conversations, and is encouraged to feel the difference after applying this            |

(cyber)bullying.

knowledge.

Attitude

Feel positive about assertive behaviour.

1. Belief selection
2. Persuasive communication

DG explains positive effects of assertive behaviour, participant is encouraged to think about positive effects of assertive behaviour.

Outcome

expectations

Expect positive outcomes associated with assertive behaviour and nvc.

1. Arguments
2. Modelling
3. Consciousness raising

DG describes positive effects of assertive behaviour. VM and DG demonstrate assertive responding and positive effects. Participant is encouraged to reflect on assertive responding.

9. Replace ineffective (aggressive/passive) behaviour (and nvc\*) with

Social skills

Demonstrate social skills needed for assertive behaviour.

1. Set task on a gradient of difficulty

Participant receives explanation and practice in assertive responses in three steps, which can be used online and offline.

|                                             |             |                                                         |                                                                                                     |                                                                                                                                                                                                                                         |
|---------------------------------------------|-------------|---------------------------------------------------------|-----------------------------------------------------------------------------------------------------|-----------------------------------------------------------------------------------------------------------------------------------------------------------------------------------------------------------------------------------------|
| effective (assertive) behaviour (and nvc*). | Self-esteem | Demonstrate self-esteem in assertive behaviour and nvc. | <ol style="list-style-type: none"> <li>1. Persuasive communication</li> <li>2. Modelling</li> </ol> | DG and VM explain and demonstrate assertive reactions (with and without assertive nvc*).                                                                                                                                                |
|                                             | Knowledge   | List assertive behaviours.                              | <ol style="list-style-type: none"> <li>1. Elaboration</li> <li>2. Use Imagery</li> </ol>            | Participant receives descriptions of assertive behaviours and how to perform it. Practice is provided by displaying images of “assertive” or strong characters, and participants are encouraged to imagine feeling like this character. |
|                                             | Attitude    | Feel positive about adapting assertive behaviour.       | <ol style="list-style-type: none"> <li>1. Belief selection</li> <li>2. Arguments</li> </ol>         | DG explains positive effects after adapting assertive behaviour, participant is encouraged to think about positive effects of (adapting) assertive behaviour.                                                                           |

|                                        |                                                                   |                                                                                                                          |                                                                                                                                                  |
|----------------------------------------|-------------------------------------------------------------------|--------------------------------------------------------------------------------------------------------------------------|--------------------------------------------------------------------------------------------------------------------------------------------------|
| Self-efficacy & Behavioural capability | Demonstrate when and how to display assertive behaviour and nvc.  | <ol style="list-style-type: none"> <li>1. Guided practice</li> <li>2. Repeated exposure</li> <li>3. Tailoring</li> </ol> | Participant receives VMs and comics demonstrating assertive behaviour tailored to coping style measured.                                         |
| Social influence                       | Recognise social influence in assertive behaviour and nvc.        | <ol style="list-style-type: none"> <li>1. Shifting focus</li> </ol>                                                      | DG acknowledges that others' presence can have influence on responding in an assertive manner.                                                   |
| Awareness                              | Be aware of positive effects associated with assertive behaviour. | <ol style="list-style-type: none"> <li>1. Consciousness raising</li> <li>2. Framing</li> </ol>                           | DG explains that assertive reactions lead to positive outcomes. Participant is encouraged to think about the lessons they have learned.          |
| Self-regulation                        | Plan to use assertive reactions and behaviour.                    | <ol style="list-style-type: none"> <li>1. Planning coping responses</li> <li>2. Implementation intentions</li> </ol>     | Participant first forms assertive responses from predefined lists. Next, participant forms coping plans with these assertive responses, choosing |

from predefined lists.

10. Maintain the constructive 5G-schema, APS coping and assertive responses.

Attitude

Feel committed to maintaining constructive 5G-schema, APS coping and assertive behaviour.

1. Arguments
2. Tailoring

DG encourages participant to practice all lessons in daily life, with warnings for possible failure, but with the message “Do not give up, practice makes perfect”. Feedback is provided about progress.

Self-efficacy & Behavioural capability

Demonstrate how to maintain constructive 5G-schema, APS coping and assertive behaviour.

1. Goal setting
2. Planning coping responses

Participant forms plans linking APS to daily life (difficult) situations, aided by DG.

Outcome expectations

Expect positive outcomes after

1. Persuasive communication

DG explains positive effects of APS coping and stresses the importance of

|                                                                                                                            |                 |                                                                                                                           |                                                                                                                                  |                                                                                                |
|----------------------------------------------------------------------------------------------------------------------------|-----------------|---------------------------------------------------------------------------------------------------------------------------|----------------------------------------------------------------------------------------------------------------------------------|------------------------------------------------------------------------------------------------|
|                                                                                                                            |                 | maintaining constructive 5G-schema, APS coping and assertive behaviour.                                                   |                                                                                                                                  | keep using this coping strategy.                                                               |
|                                                                                                                            | Self-regulation | Evaluate and/or adjust plans to use the skills learned concerning 5G-schema, APS coping and assertive responding lessons. | <ol style="list-style-type: none"> <li>1. Tailoring</li> <li>2. Active learning</li> <li>3. Implementation intentions</li> </ol> | Participant evaluates own plans, and adjusts if necessary.                                     |
| 11.Prevent and solve negative cyber bully experiences by using the Internet and mobile phones in a safe and secure manner. | Knowledge       | List security and safety advices for the Internet and mobile phones.                                                      | 1. Prompts                                                                                                                       | Participant receives prompts concerning safe Internet/mobile phone use.                        |
|                                                                                                                            | Attitude        | Feel positive about safe and secure use of the Internet and mobile phones.                                                | 1. Arguments                                                                                                                     | DG explains positive effects of safety tips and guidelines safe Internet and mobile phone use. |

|                                        |                                                                                         |                                           |                                                                                                                                                            |
|----------------------------------------|-----------------------------------------------------------------------------------------|-------------------------------------------|------------------------------------------------------------------------------------------------------------------------------------------------------------|
| Self-efficacy & Behavioural capability | Demonstrate how to use the Internet and mobile phones in a secure manner.               | 1. Modelling                              | DG explains and demonstrates (via screenshots) how to form safe passwords, and provides information how to protect yourself on the Internet.               |
| Outcome expectations                   | Expect positive outcomes after using the Internet and mobile phones in a secure manner. | 1. Arguments                              | DG explains participant that safe use of the Internet and mobile phone leads to less cyberbullying.                                                        |
| Awareness                              | Become aware of own insecure and unsafe use of the Internet and mobile phones.          | 1. Consciousness raising<br>2. Loss frame | DG explains that unsafe internet use heightens the chance of becoming a cyberbully victim. Participant is encouraged to think about own Internet-behaviour |
| Self-regulation                        | Form plans to keep using                                                                | 1. Goal setting                           | Participant chooses plans related to                                                                                                                       |

the Internet in a secure  
manner

2. Implementation  
intentions

the safe use of Internet and resetting  
passwords regularly.

---

*Note.* DG= Digital Guide

VM= Video model

YSR= Youth Self-Report ([Achenbach, 1991](#))

APS= Active, Problem-Solving coping

Nvc= non-verbal communication
